# Supplementary material for: TFAP2 paralogs regulate melanocyte differentiation in parallel with MITF
Source: PubMed Central journal article supplement (PMC5352137; doi:10.1371/journal.pgen.1006636), 2017-03-01

*tfap2a*<sup>+/-</sup>

*tfap2a*<sup>-/-</sup>

**A**

**G**

28 hpf

**B**

**H**

30 hpf

**C**

**I**

32 hpf

**D**

**J**

34 hpf

**E**

**K**

36 hpf

**F**

**L**

38 hpf

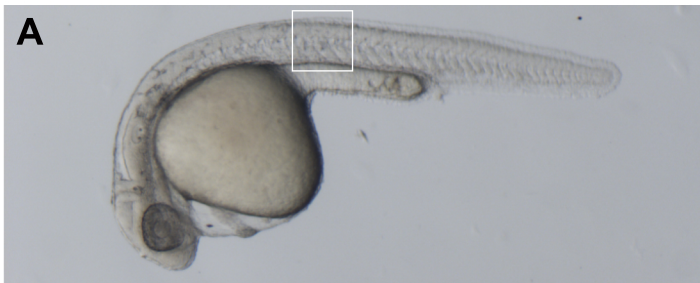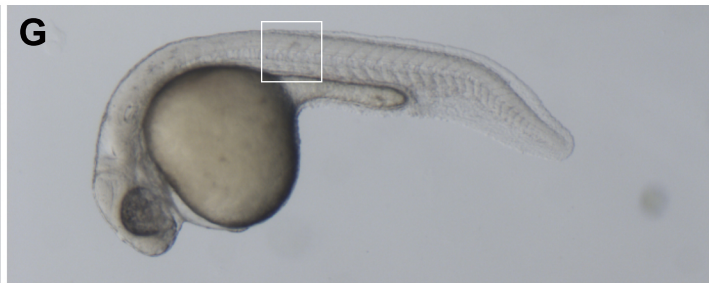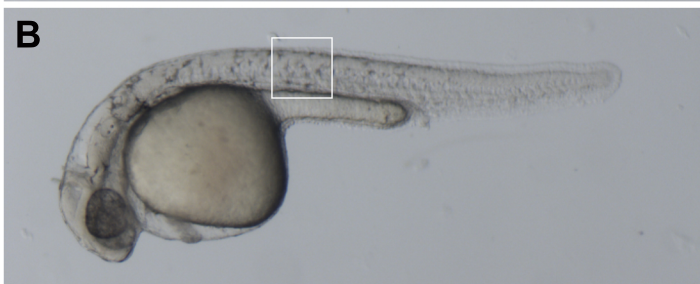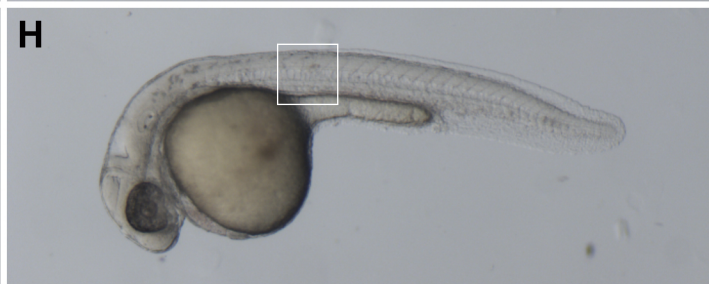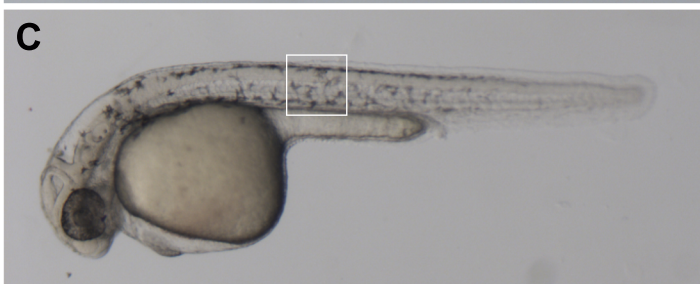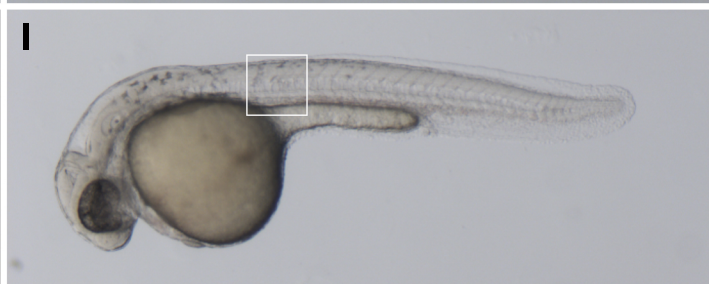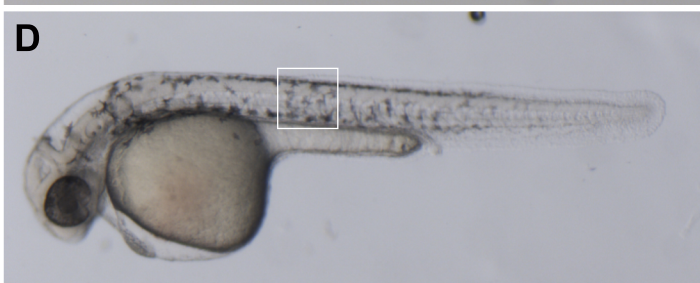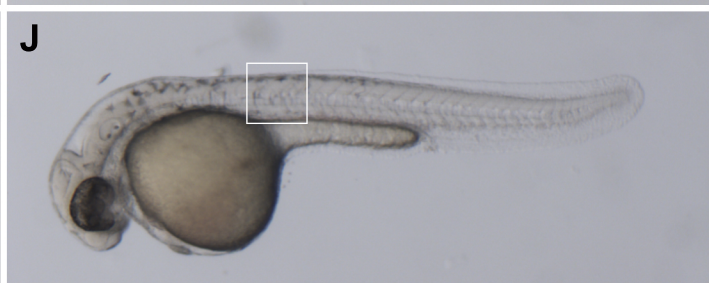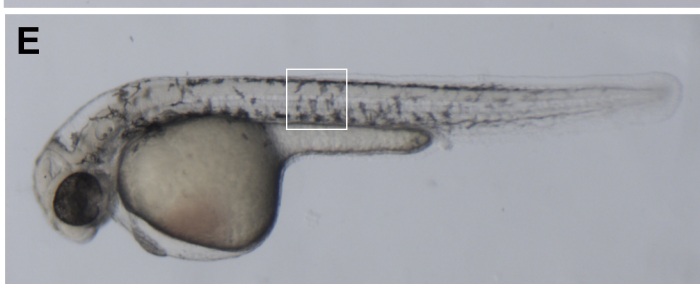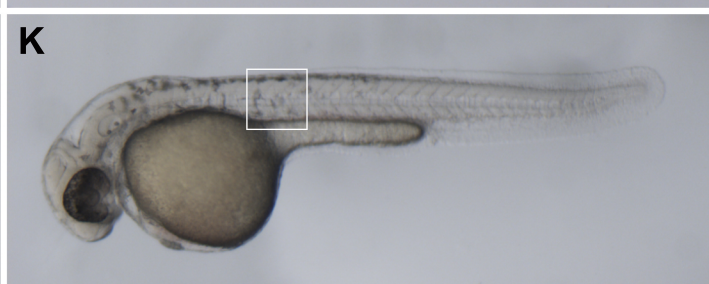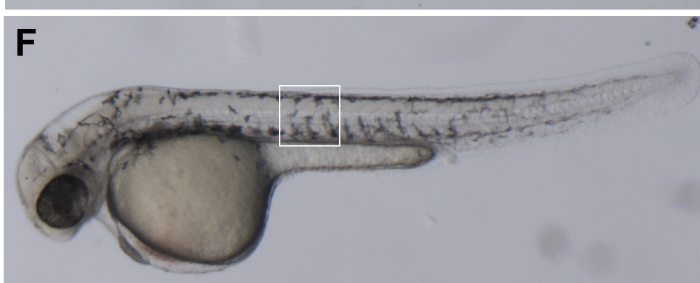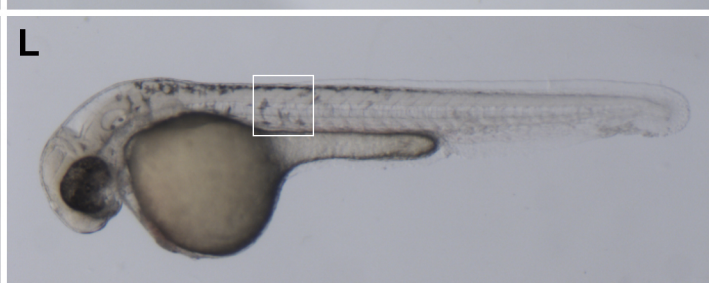

Supplement: pgen.1006636.s001.pdf [file pgen.1006636.s001.pdf]
