# Supplementary material for: TFAP2 paralogs regulate melanocyte differentiation in parallel with MITF
Source: PubMed Central journal article supplement (PMC5352137; doi:10.1371/journal.pgen.1006636), 2017-03-01

**A** CentriMo TFAP2A peaks in mouse melan-a cells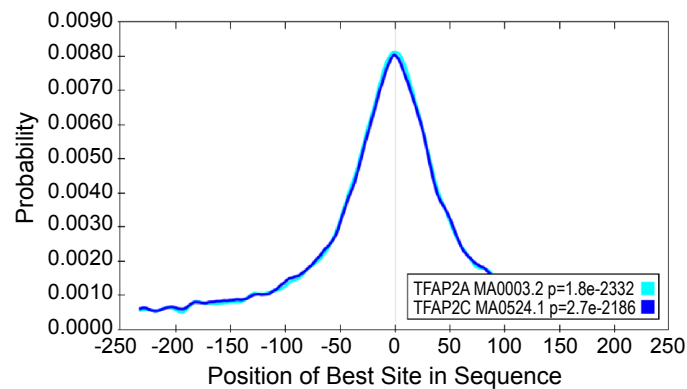**B** ChIP-qPCR mouse melan-a cells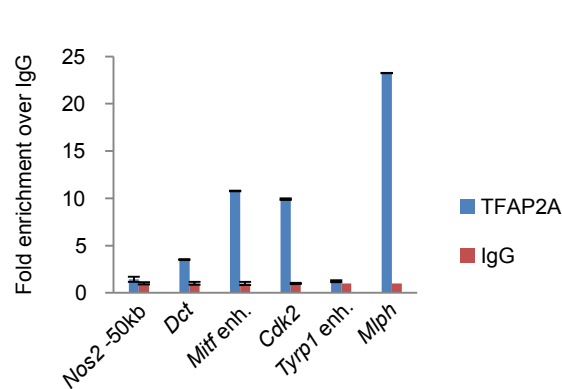**C** CentriMo TFAP2A peaks in human melanocytes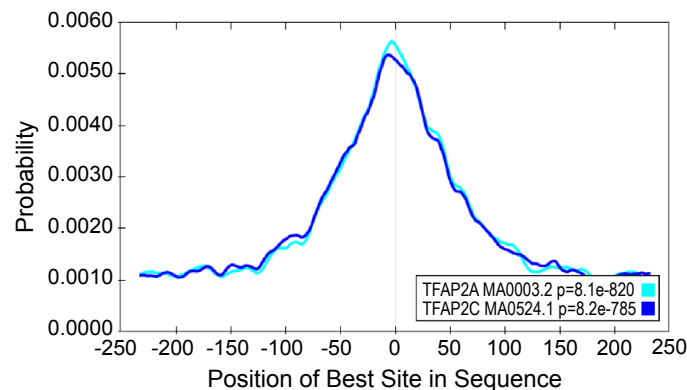**D** ChIP-qPCR human melanocytes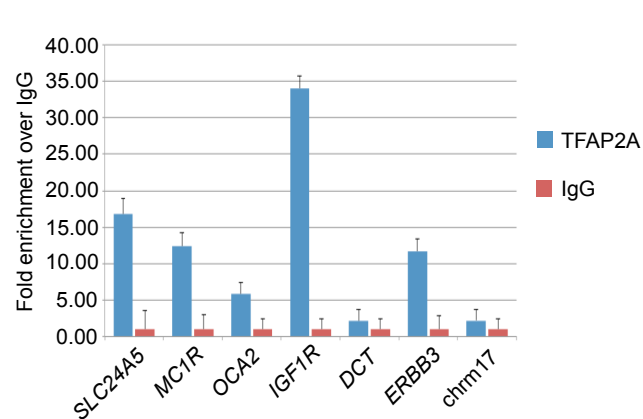**E** ChIP-qPCR human M21 melanoma cells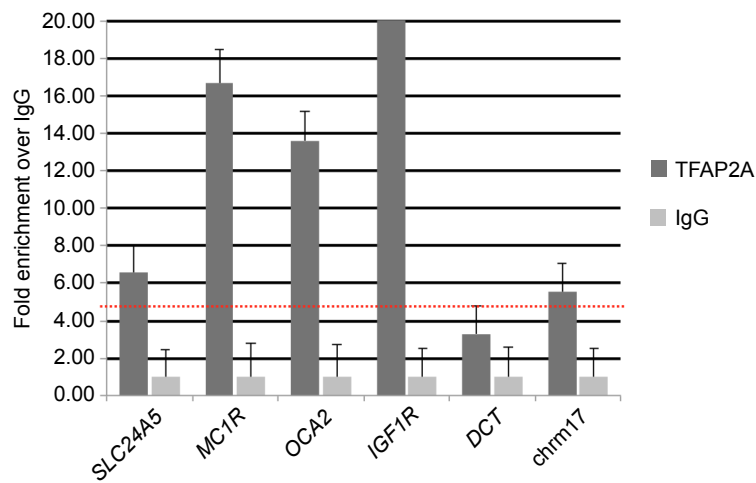

Supplement: pgen.1006636.s003.pdf [file pgen.1006636.s003.pdf]
