# Supplementary material for: TFAP2 paralogs regulate melanocyte differentiation in parallel with MITF
Source: PubMed Central journal article supplement (PMC5352137; doi:10.1371/journal.pgen.1006636), 2017-03-01
Supplement: pgen.1006636.s004.pdf [file pgen.1006636.s004.pdf]

**A** Distribution of TFAP2A peaks in human melanocytes

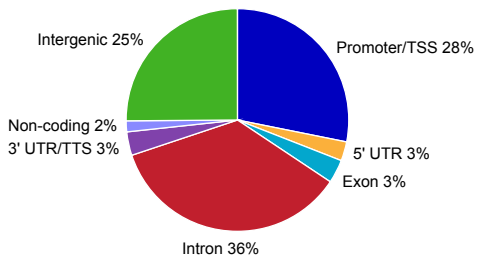

**B** Distance from TSS to nearest TFAP2A peak

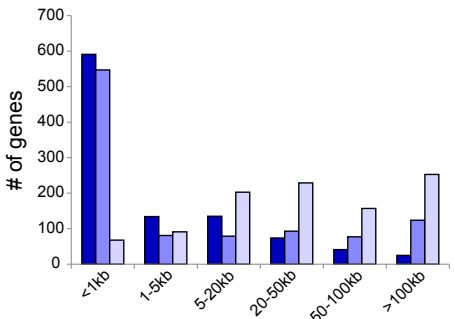

Genes expressed in human primary melanocytes:  
■ Highest 1000    ■ Median 1000    □ Lowest 1000
