# Supplementary material for: TFAP2 paralogs regulate melanocyte differentiation in parallel with MITF
Source: PubMed Central journal article supplement (PMC5352137; doi:10.1371/journal.pgen.1006636), 2017-03-01

**A****Human Gene Ontology Terms 13,690 TFAP2A peaks****GO Biological Process** $-\log_{10}(\text{Binomial p value})$ 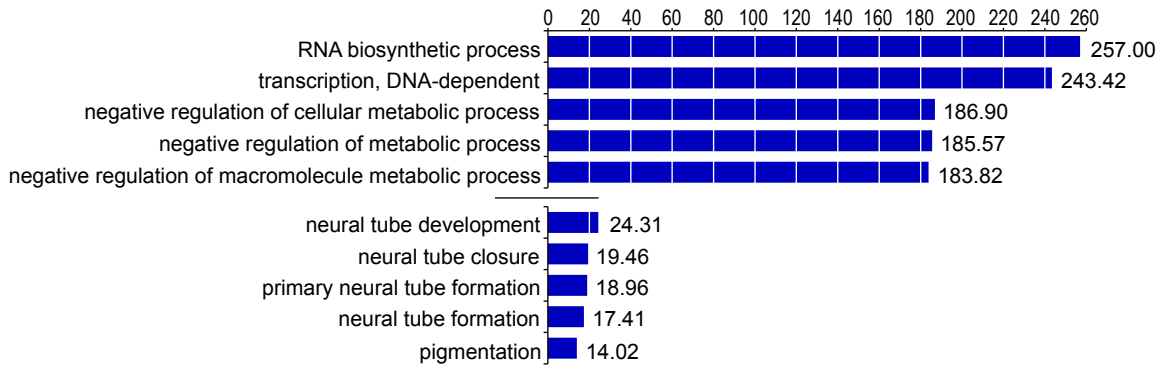**GO Cellular Component** $-\log_{10}(\text{Binomial p value})$ 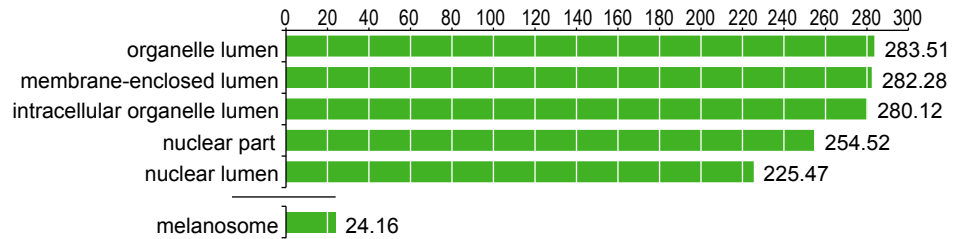**Disease Ontology** $-\log_{10}(\text{Binomial p value})$ 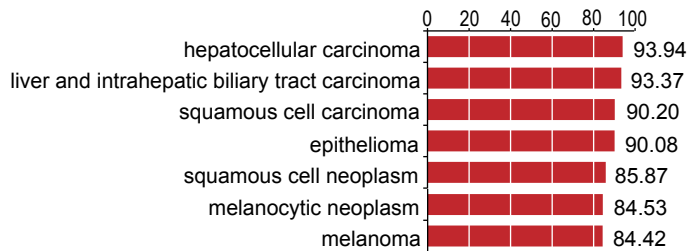

## B Mouse Gene Ontology Terms 16,305 TFAP2A peaks

### GO Biological Process

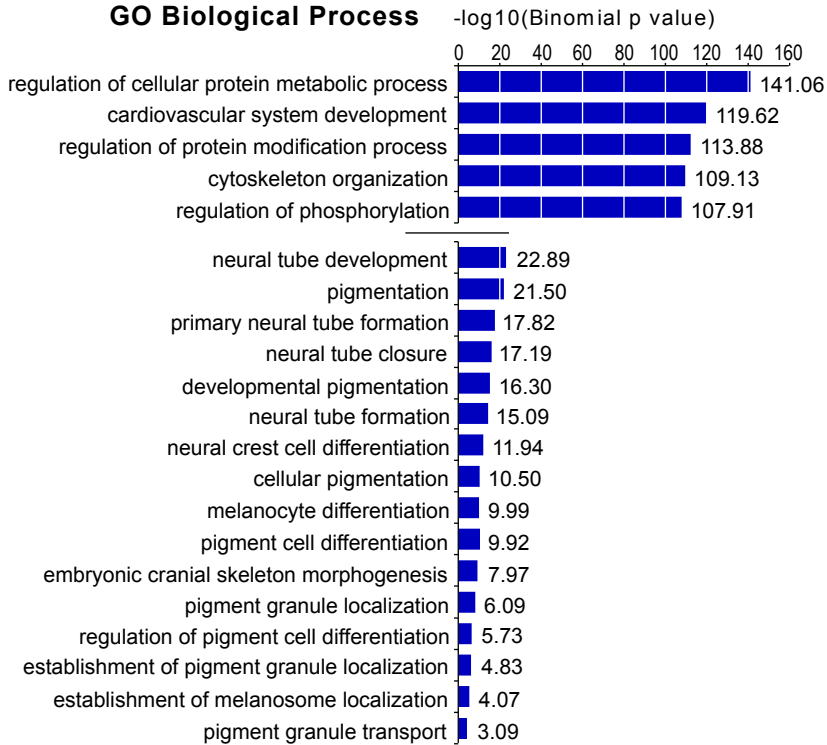

### GO Cellular Component

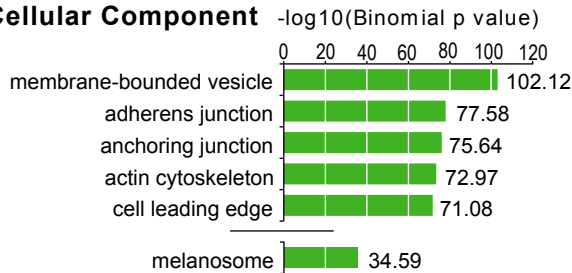

### Disease Ontology

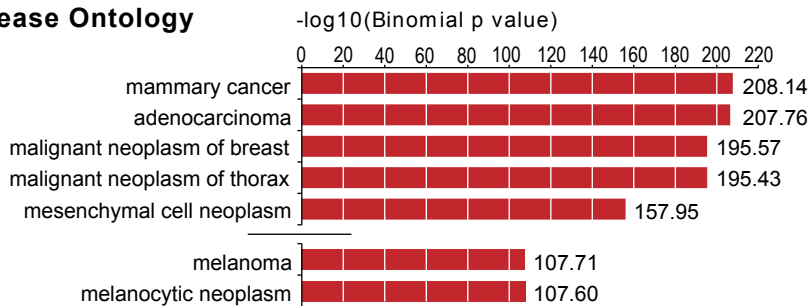

**C**

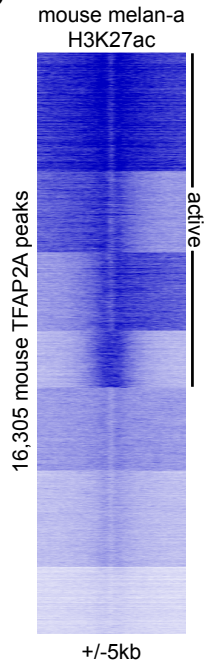

Supplement: pgen.1006636.s006.pdf [file pgen.1006636.s006.pdf]
