# Supplementary material for: TFAP2 paralogs regulate melanocyte differentiation in parallel with MITF
Source: PubMed Central journal article supplement (PMC5352137; doi:10.1371/journal.pgen.1006636), 2017-03-01

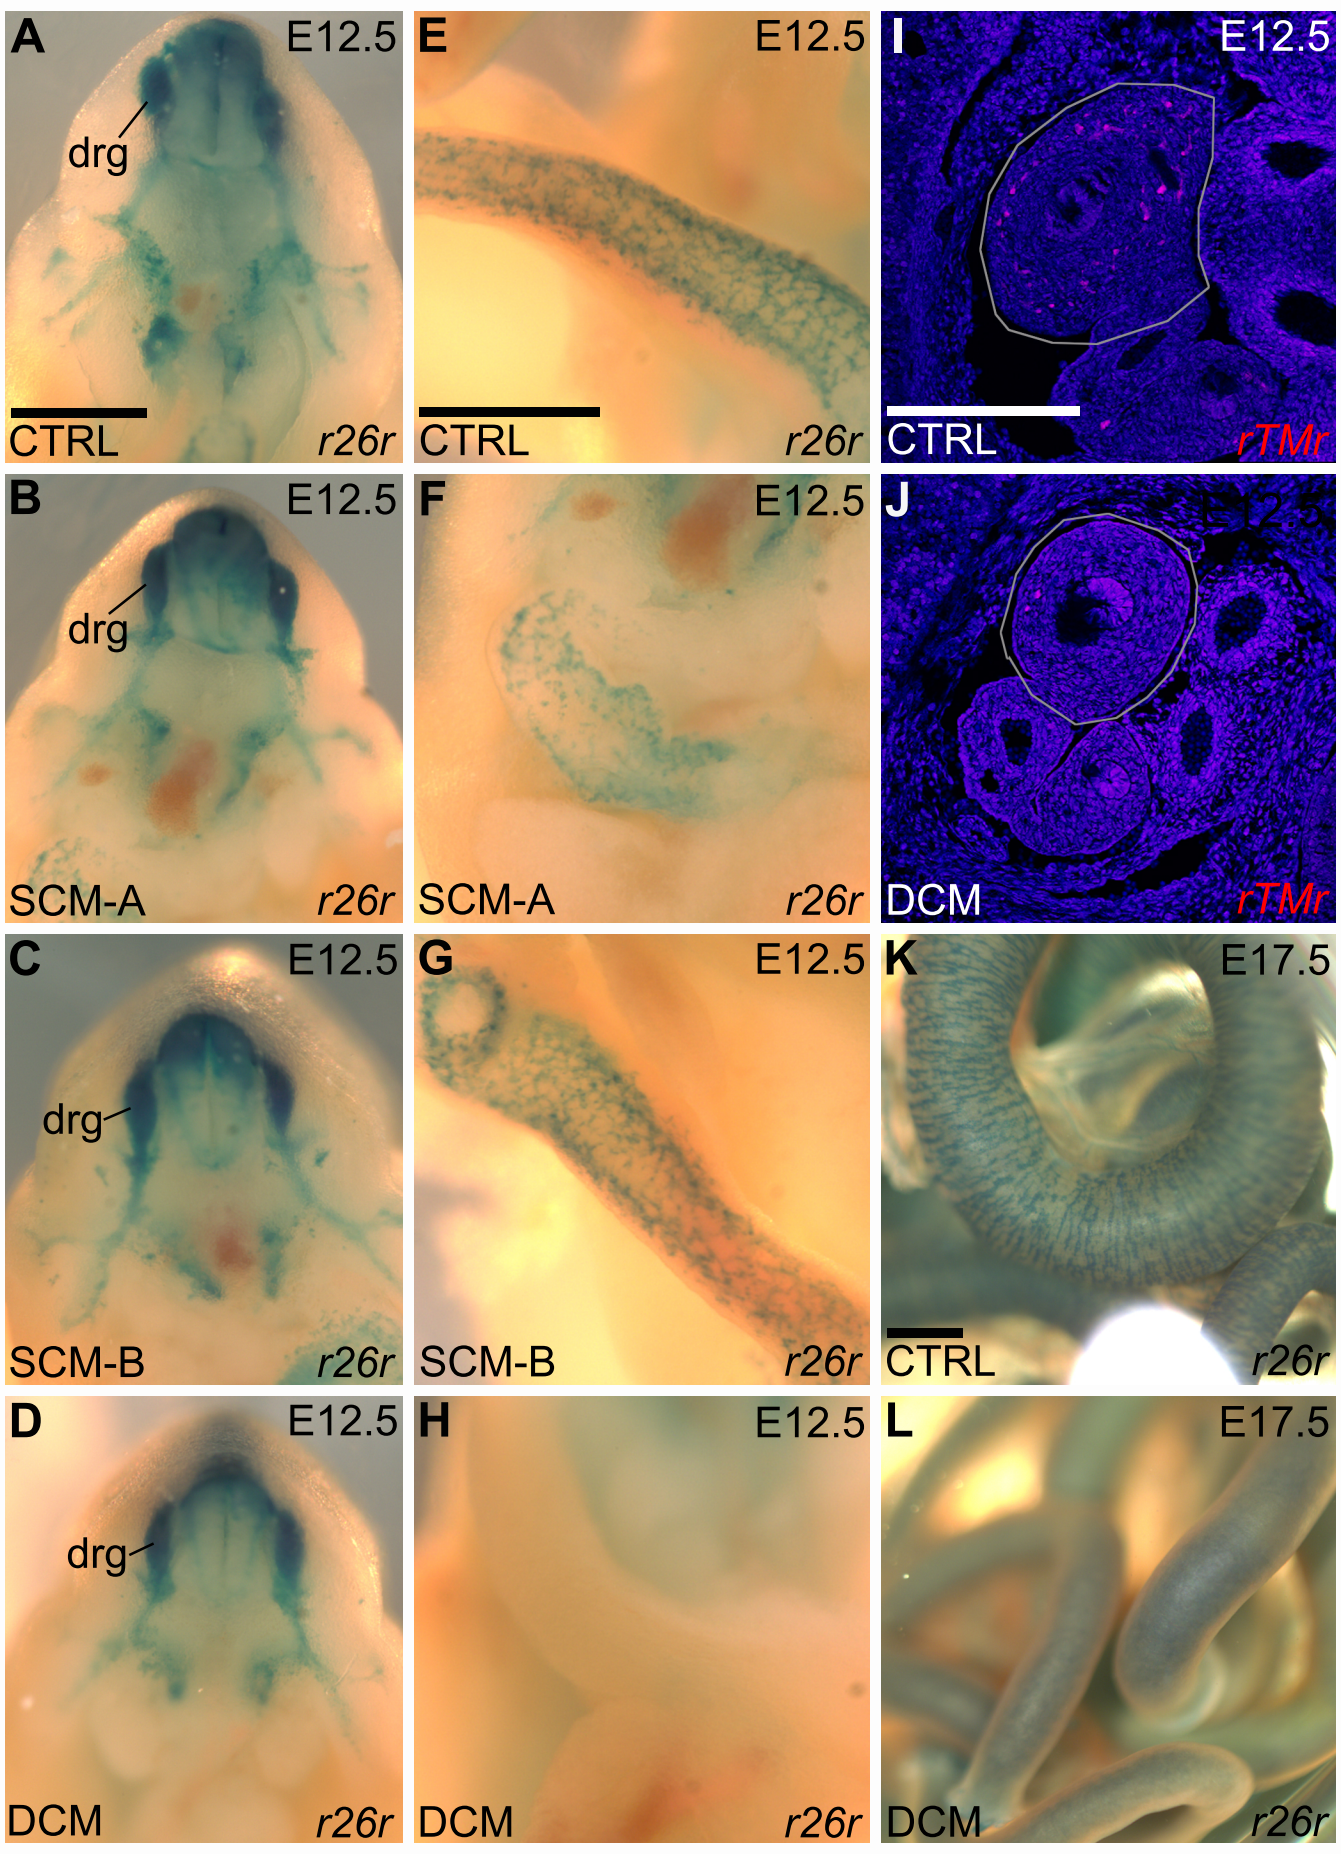

Supplement: pgen.1006636.s010.pdf [file pgen.1006636.s010.pdf]
